# Supplementary material for: The GAG-Binding Peptide MIG30 Protects against Liver Ischemia-Reperfusion in Mice
Source: MDPI journal article supplement (doi:10.3390/ijms23179715), 2022-08-26
Supplement: s1 [file s1]

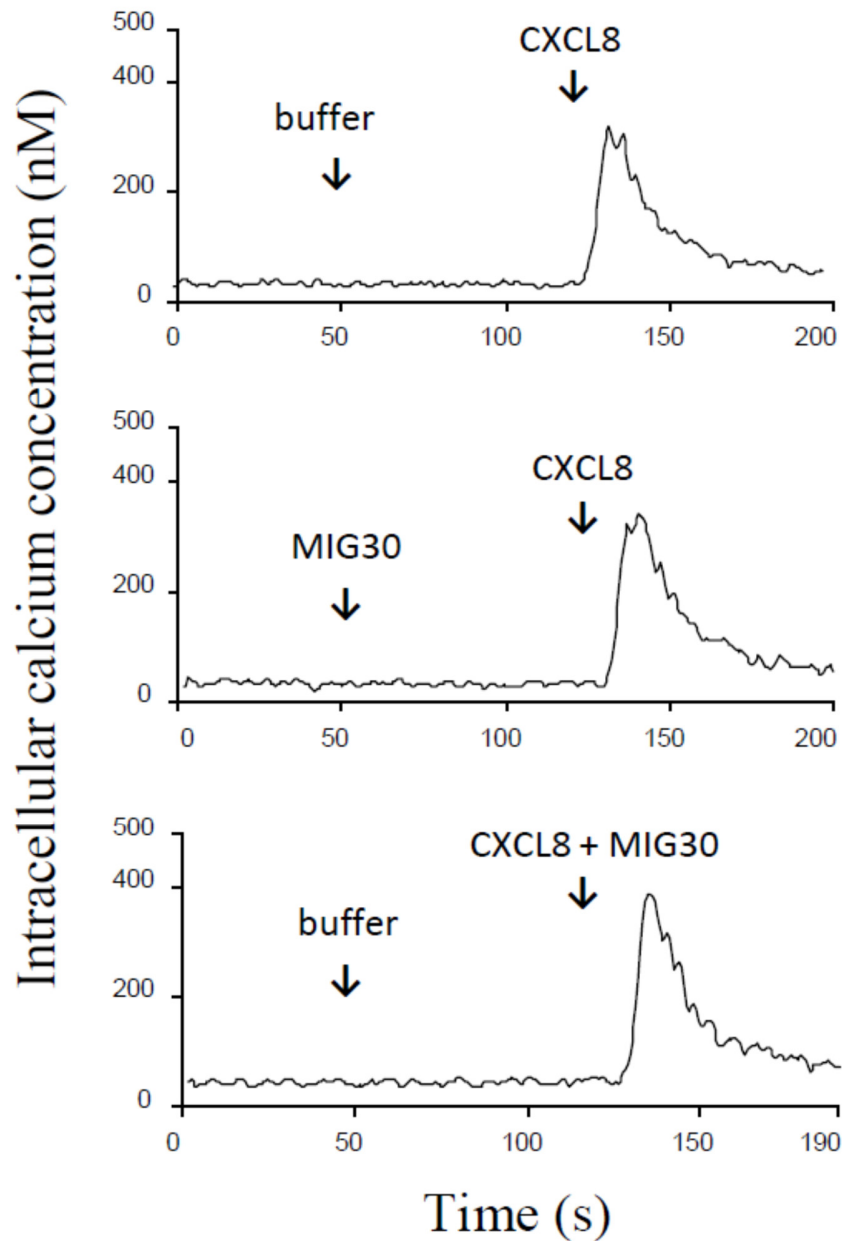

**Supplementary Figure S1. MIG30 does not induce nor inhibits CXCL8-induced calcium responses in human neutrophils.** The intracellular calcium concentration of purified human neutrophils stimulated with buffer (peptide vehicle) or MIG30 (20  $\mu\text{g/ml}$ ), and 70 s later with CXCL8 (10  $\text{ng/ml}$ ) or the combination CXCL8 and MIG30 (20  $\mu\text{g/ml}$ ). The spectra of one representative experiment are shown out of 4 independent experiments. The time of addition of the first and second stimulus are indicated by arrowheads.
